# Supplementary material for: Tumor treating fields affect mesothelioma cell proliferation by exerting histotype-dependent cell cycle checkpoint activations and transcriptional modulations
Source: PubMed Central journal article supplement (PMC9287343; doi:10.1038/s41419-022-05073-4), 2022-07-15

Full WB p27 – Supplementary Figure S5

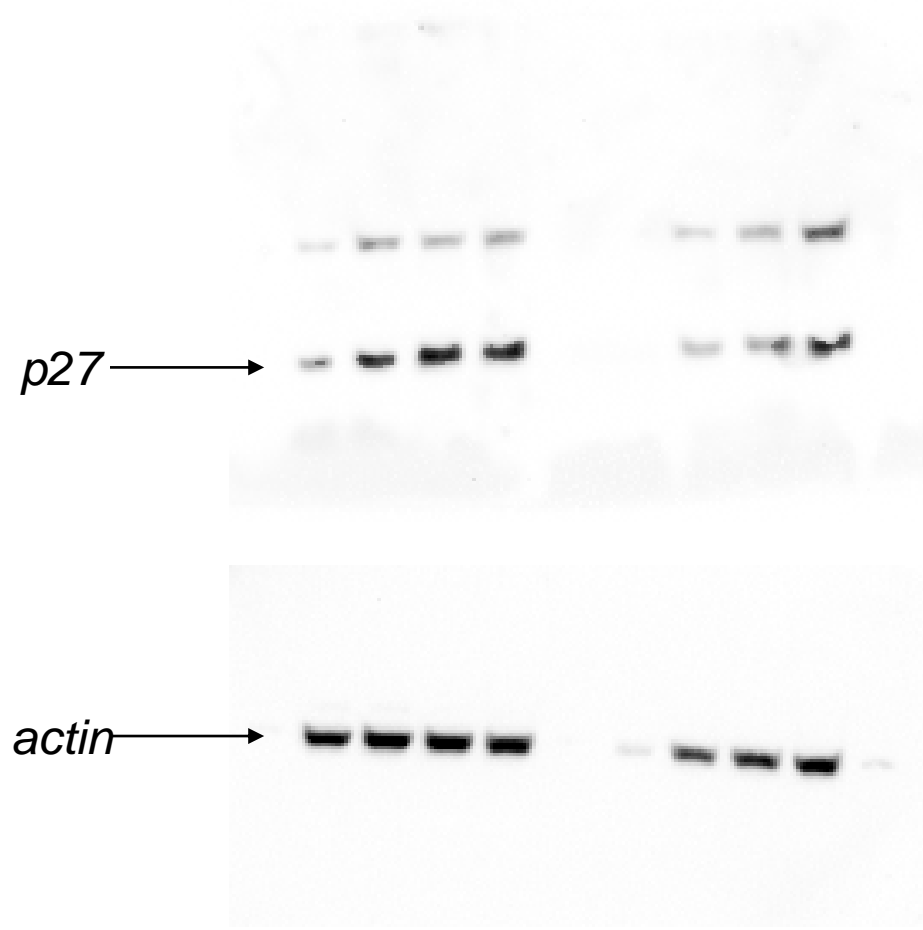

Full WB p53 – Supplementary Figure S5

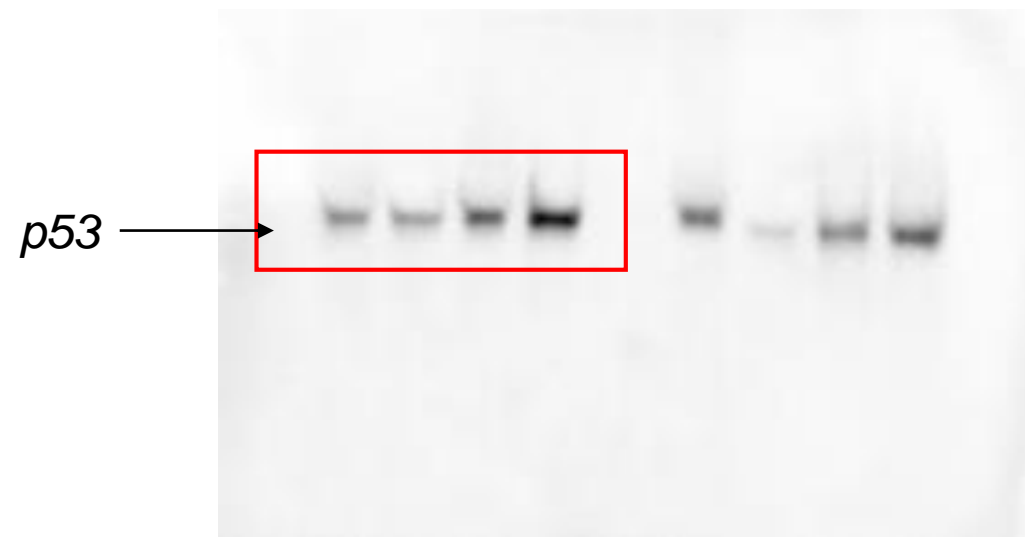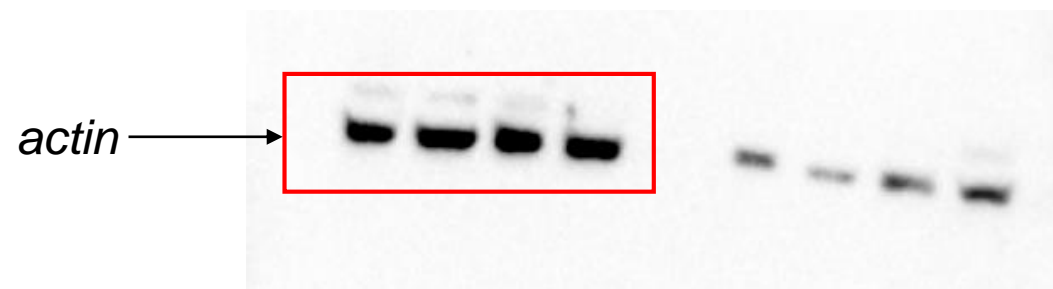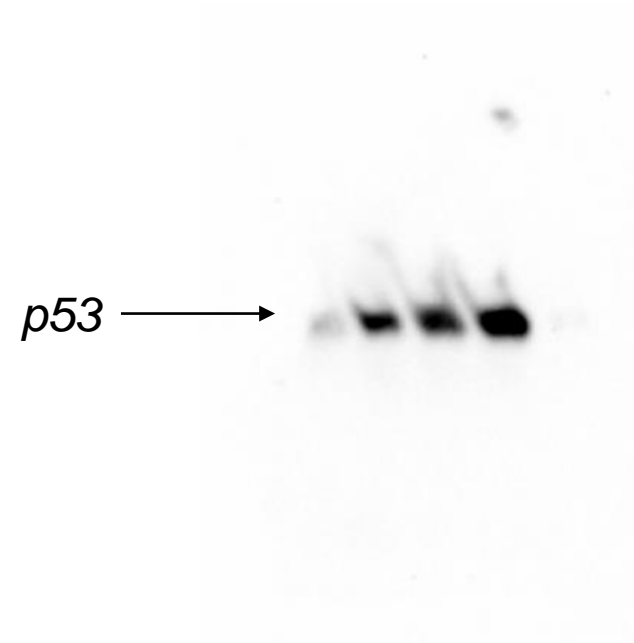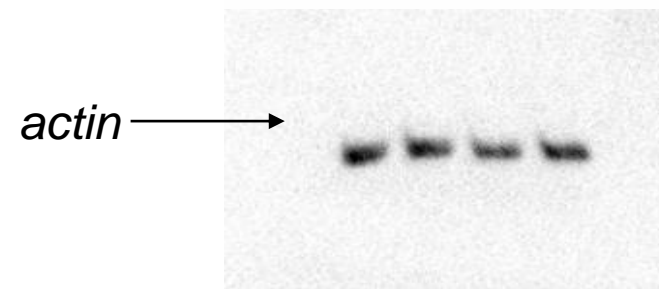

Full WB pChk1 and Chk1 – Supplementary Figure S5

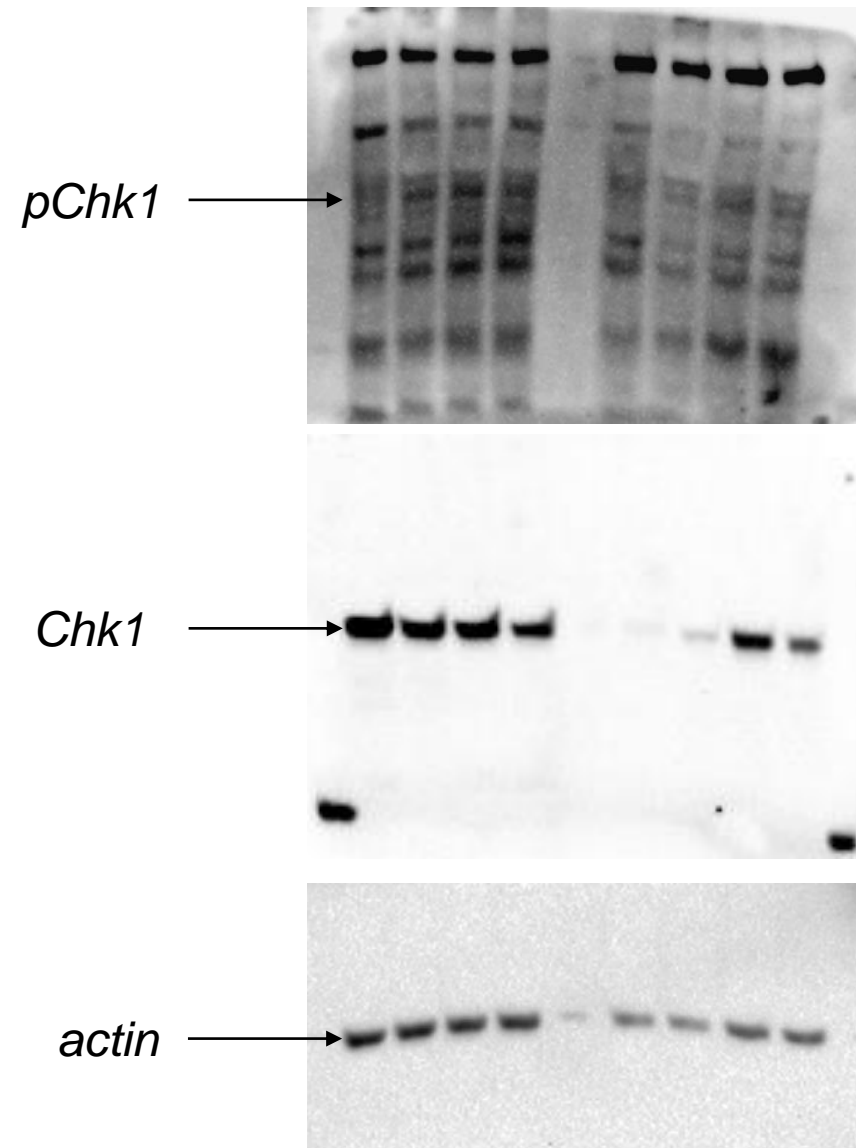

Full WB caspase-9 – Supplementary Figure S5

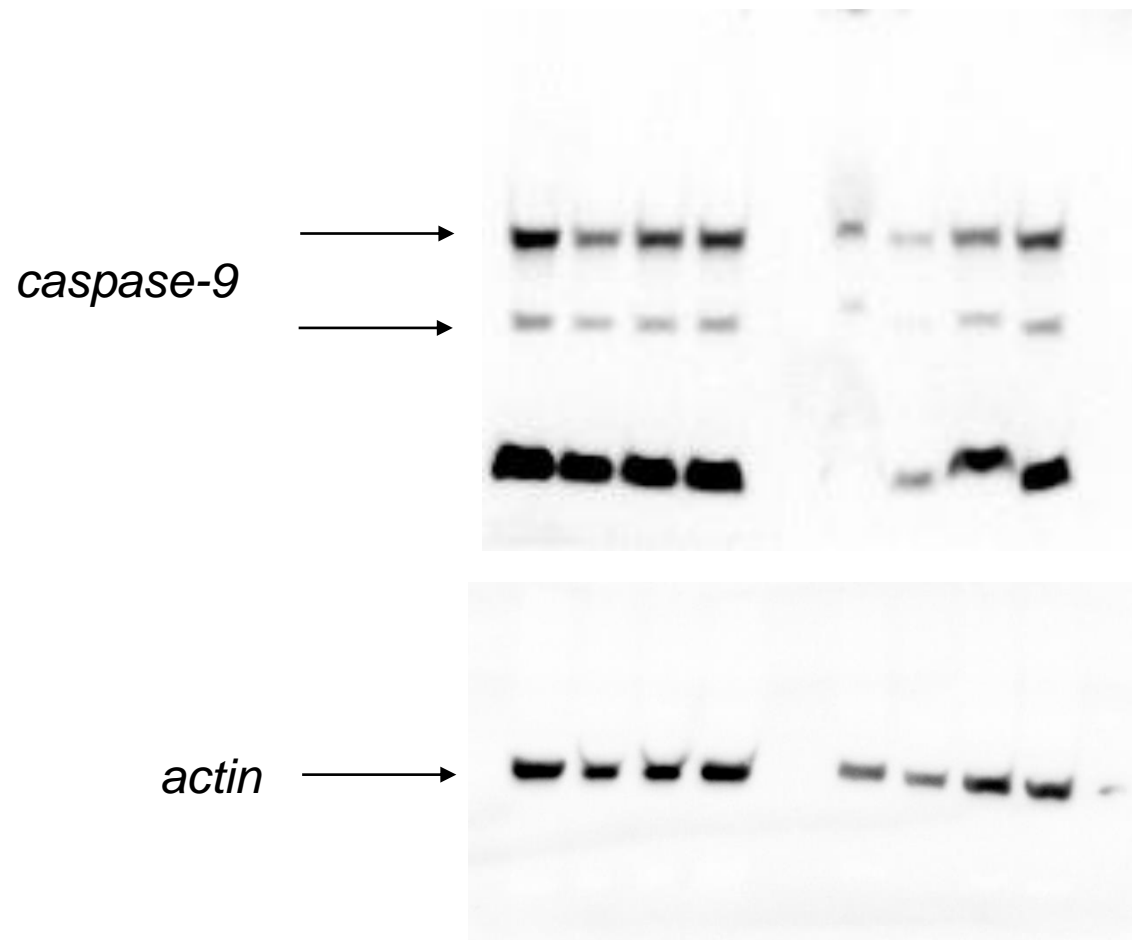

Full WB caspase-3 – Supplementary Figure S5 (in Supplementary Fig. S5 the order of CD473 and CD60 samples is inverted)

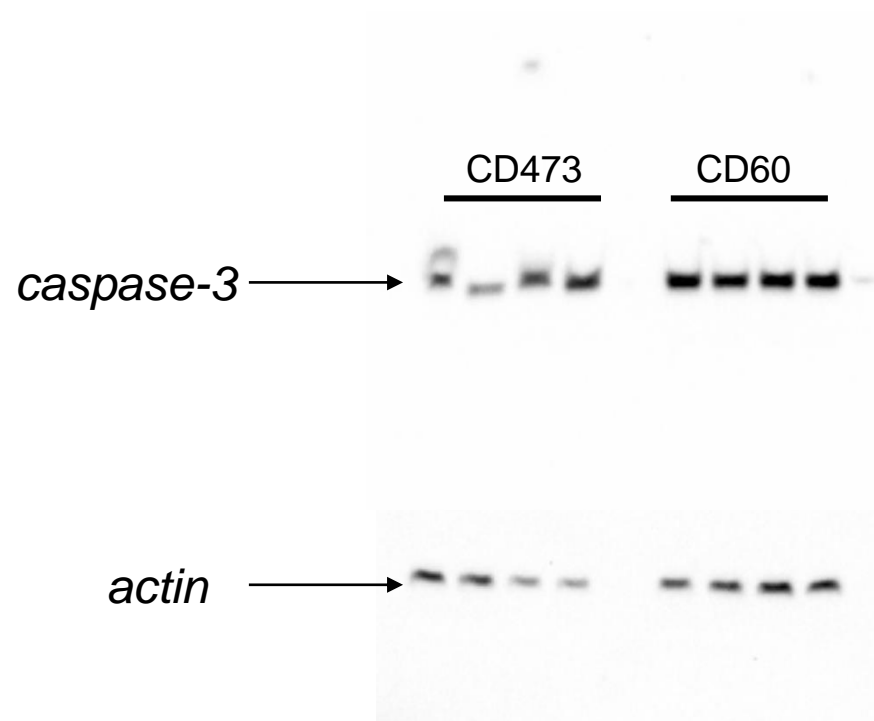

Full WB NOTUM – Supplementary Figure S7

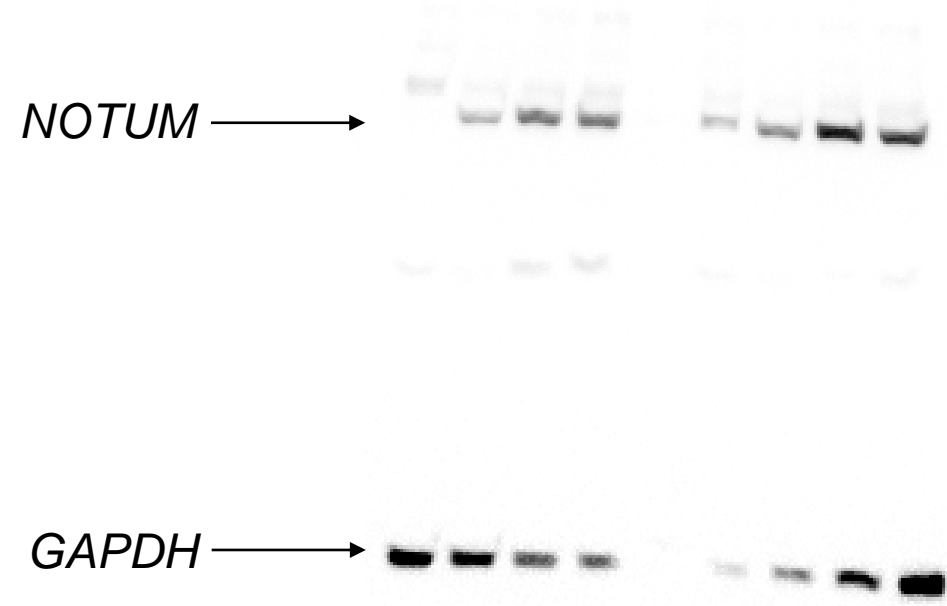

Supplement: 41419_2022_5073_MOESM5_ESM.pdf [file 41419_2022_5073_MOESM5_ESM.pdf]
