# Supplementary material for: Tumor treating fields affect mesothelioma cell proliferation by exerting histotype-dependent cell cycle checkpoint activations and transcriptional modulations
Source: PubMed Central journal article supplement (PMC9287343; doi:10.1038/s41419-022-05073-4), 2022-07-15
Supplement: 41419_2022_5073_MOESM7_ESM.pdf [file 41419_2022_5073_MOESM7_ESM.pdf]

Please complete the table below to indicate the contributions of all named authors to the figures.

Figure 1:

|  |
|--|
|  |
|--|

Figure 2:

|  |
|--|
|  |
|--|

Figure 3:

|  |
|--|
|  |
|--|

Figure 4:

|  |
|--|
|  |
|--|

Figure 5:

|  |
|--|
|  |
|--|

Figure 6:

|  |
|--|
|  |
|--|

Signed for and on behalf of the Author(s):

*Mouica Lyni*

Print Name:

|  |
|--|
|  |
|--|

Date:

|  |
|--|
|  |
|--|
